# Supplementary material for: Insulin-like Peptide Receptor (ILPR) in the Cuttlefish Sepiella japonica: Characterization, Expression, and Regulation of Reproduction
Source: MDPI journal article supplement (doi:10.3390/ijms232112903), 2022-10-26
Supplement: s1 [file s1]

## Supplementary Material

### 1 Supplementary Tables

Table S1: Nucleotide sequences of primers and dsRNAs used

|                             | Sequence (5'-3')       | Usage                   |
|-----------------------------|------------------------|-------------------------|
| ILPR-F                      | ACAACAAGAGCCATTAAGC    | cDNA fragment cloning   |
| ILPR-R                      | GCAAGTTATGTCCGAGTATT   |                         |
| ILPR 3'-F                   | TGCTTACTTGTTGGTCATAC   | 3'-RACE                 |
| ILPR 3'-R                   | CGCAATCAACAAGCAGAG     |                         |
| ILPR 5'-F                   | GCCATTAGAAGCACAGACA    | 5'-RACE                 |
| ILPR 5'-R                   | TCTTACAGACGGCACCAT     |                         |
| RT-ILPR-F                   | GGTGGAGATCACTGACTATC   | Real-time PCR           |
| RT-ILPR-R                   | CTCCACGCTGAATAACTGT    |                         |
| RT-Vg1-F                    | CACCTGCGACTGAACCTAAA   | qPCR for <i>Vg1</i>     |
| RT-Vg1-R                    | CAAGACGCTCAAGCAACATG   |                         |
| RT-Vg2-F                    | GAGTCAGGCTTGCTATGG     | qPCR for <i>Vg2</i>     |
| RT-Vg2-R                    | GTGGATTCACTACGGTCTAAG  |                         |
| RT-CtsL1-like-F             | GTATCTACTTACATACGCTGAC | qPCR for CtsL1-like     |
| RT-CtsL1-like-R             | AGTCCGAATAATGAGATGCT   |                         |
| RT- FS-F                    | CTTGTCGTATGCGTGGAA     | qPCR for FS             |
| RT- FS-R                    | ATATAGGCGATACTGACTGAC  |                         |
| RT- $\beta$ -actin F        | GCCAGTTGCTCGTTACAG     | qPCR for $\beta$ -actin |
| RT- $\beta$ -actin R        | GCCAACAATAGATGGGAAT    |                         |
| negative control- sense     | UUCUUCGAACGUGUCACGUTT  | RNA interference        |
| negative control- antisense | ACGUGACACGUUCGGAGAATT  |                         |
| SjILPR siRNA1- sense        | GCAAGUUAUGUCCGAGUAUTT  | RNA interference        |
| SjILPR siRNA1- antisense    | AUACUCGGACAUAACUUGCTT  |                         |
| SjILPR siRNA2- sense        | GCUGGCUACAUGAAGAUATT   | RNA interference        |
| SjILPR siRNA2- antisense    | UAUCUUCAAUGUAGCCAGCTT  |                         |

Table S2. Accession numbers to the sequences in Multiple sequence alignment

| Gene          | Species                          | Accession numbers |
|---------------|----------------------------------|-------------------|
| <i>SjILPR</i> | <i>Sepiella japonica</i>         | MK611806          |
| <i>ObILPR</i> | <i>Octopus bimaculoides</i>      | XP014780880.1     |
| <i>LsMIPR</i> | <i>Lymnaea stagnalis</i>         | CAA59353.1        |
| <i>BgIR</i>   | <i>Biomphalaria glabrata</i>     | AAF31166.1        |
| <i>PfIRR</i>  | <i>Pinctada fucata</i>           | AGA94627.1        |
| <i>AaIR</i>   | <i>Aedes aegypti</i>             | AAB17094.1        |
| <i>BiILPR</i> | <i>Branchiostoma lanceolatum</i> | AAB50848.1        |
| <i>HsINS</i>  | <i>Homo sapiens</i>              | AAA59174.1        |

Table S3. List of accession numbers and identity of IRs from other species with *SjILPR*

| Species                          | Accession numbers | Identities (%) |
|----------------------------------|-------------------|----------------|
| <i>Sepiella japonica</i>         | MK611806          | 100            |
| <i>Octopus bimaculoides</i>      | XP014780880.1     | 67.3           |
| <i>Lymnaea stagnalis</i>         | CAA59353.1        | 39.2           |
| <i>Biomphalaria glabrata</i>     | AAF31166.1        | 36.6           |
| <i>Pinctada fucata</i>           | AGA94627.1        | 46.7           |
| <i>Aedes aegypti</i>             | AAB17094.1        | 35.6           |
| <i>Branchiostoma lanceolatum</i> | AAB50848.1        | 41.6           |
| <i>Homo sapiens</i>              | AAA59174.1        | 40.7           |

Table S4. Summary of functional annotation of unigenes.

| Database                           | Number.of.Unigenes | Percentage (%) |
|------------------------------------|--------------------|----------------|
| Annotated in NR                    | 25602              | 24.82          |
| Annotated in NT                    | 8201               | 7.95           |
| Annotated in KO                    | 12276              | 11.9           |
| Annotated in SwissProt             | 17718              | 17.18          |
| Annotated in PFAM                  | 28190              | 27.33          |
| Annotated in GO                    | 28190              | 27.33          |
| Annotated in KOG                   | 6637               | 6.43           |
| Annotated in all Databases         | 2013               | 1.95           |
| Annotated in at least one Database | 37171              | 36.04          |
| Total Unigenes                     | 103117             | 100            |

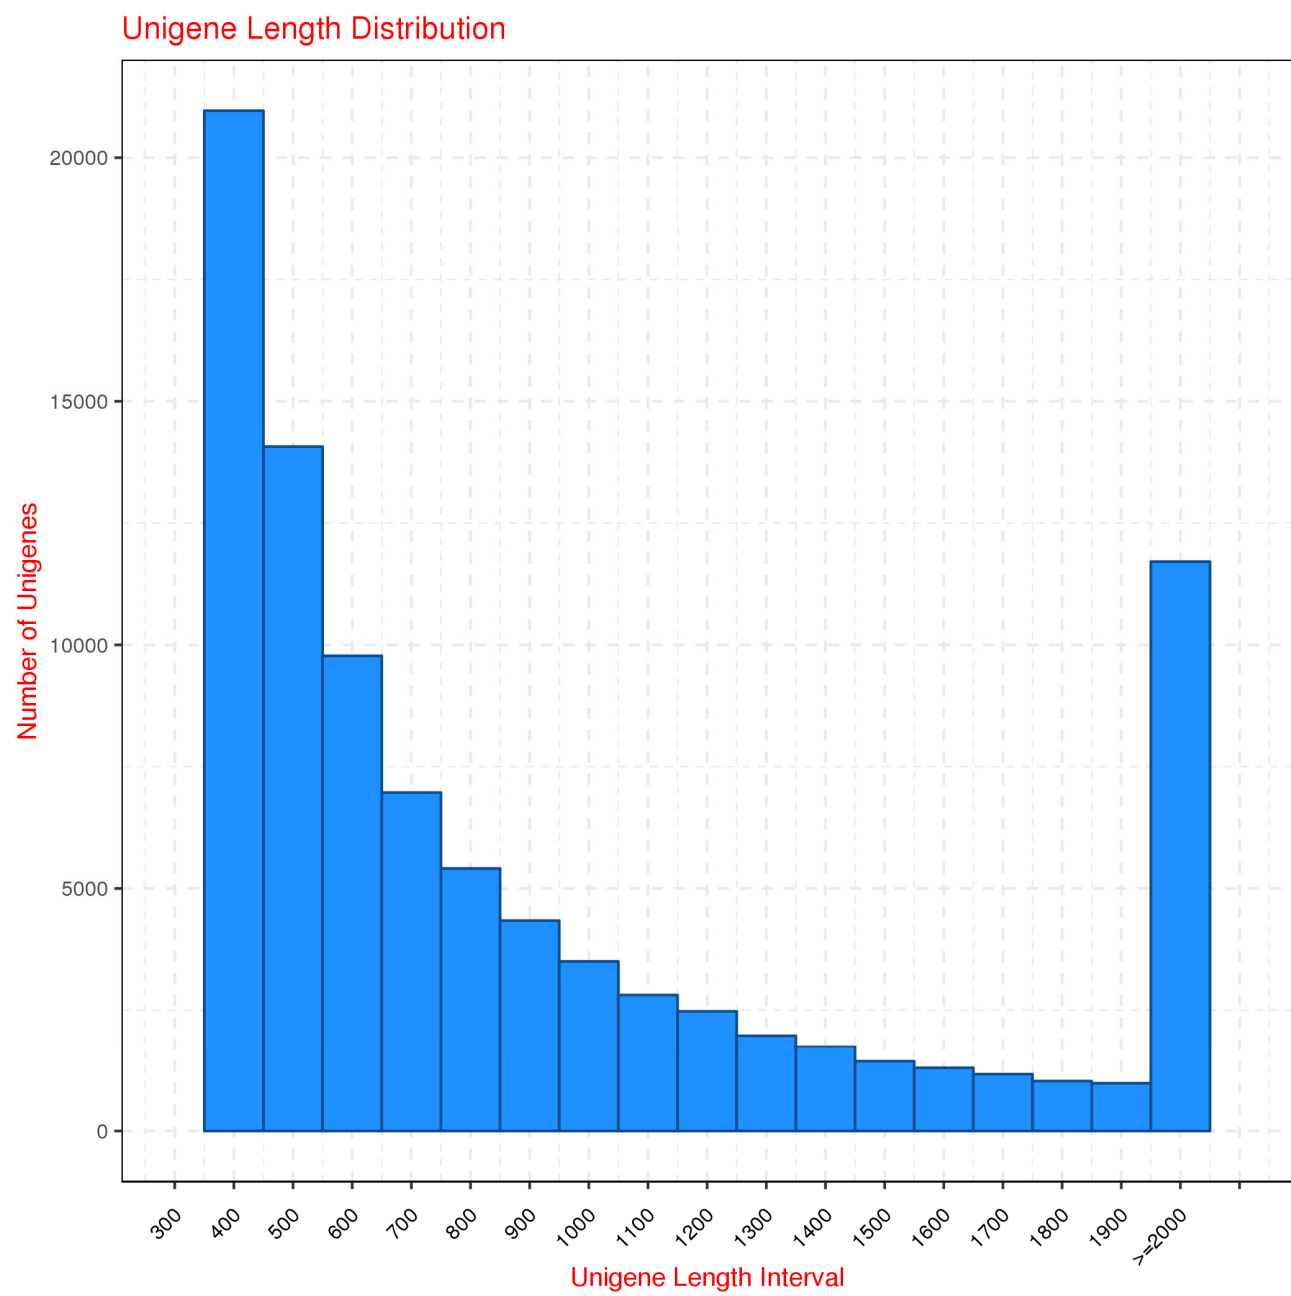

Figure S1. Length distribution of all-unigenes.
